# Supplementary material for: Polo-like kinase 2 inhibition reduces serine-129 phosphorylation of physiological nuclear alpha-synuclein but not of the aggregated alpha-synuclein
Source: PubMed Central journal article supplement (PMC8494365; doi:10.1371/journal.pone.0252635), 2021-10-06

**Fig.1 b**

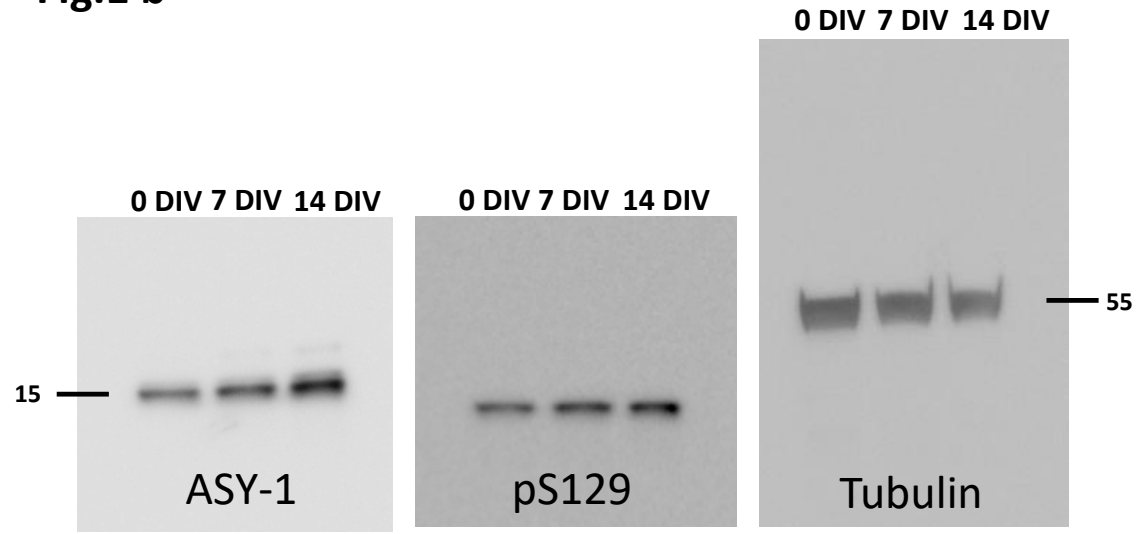

**Fig.1 f**

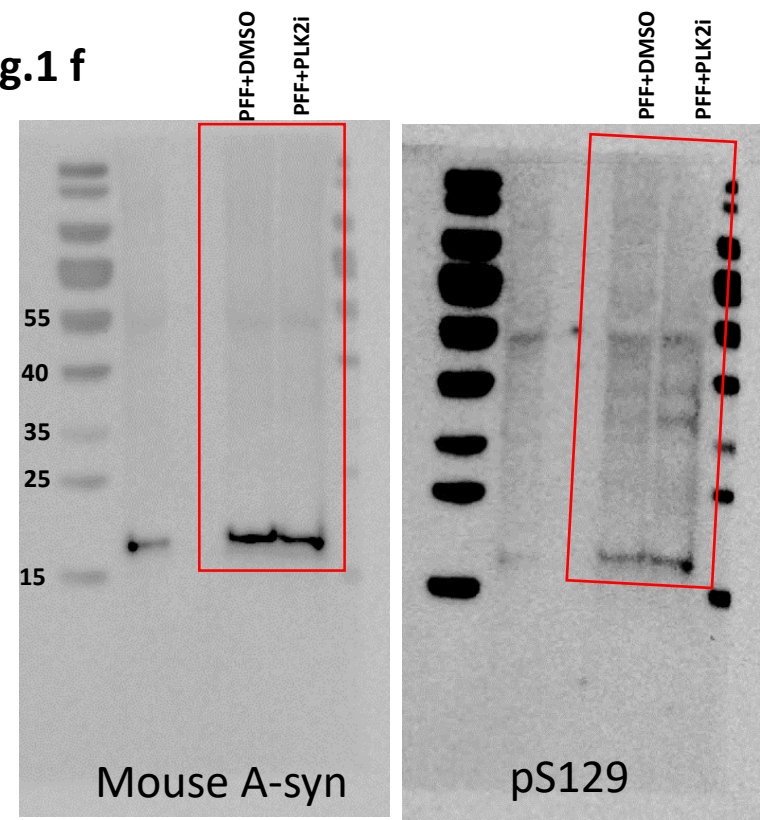

**Fig.1 c**

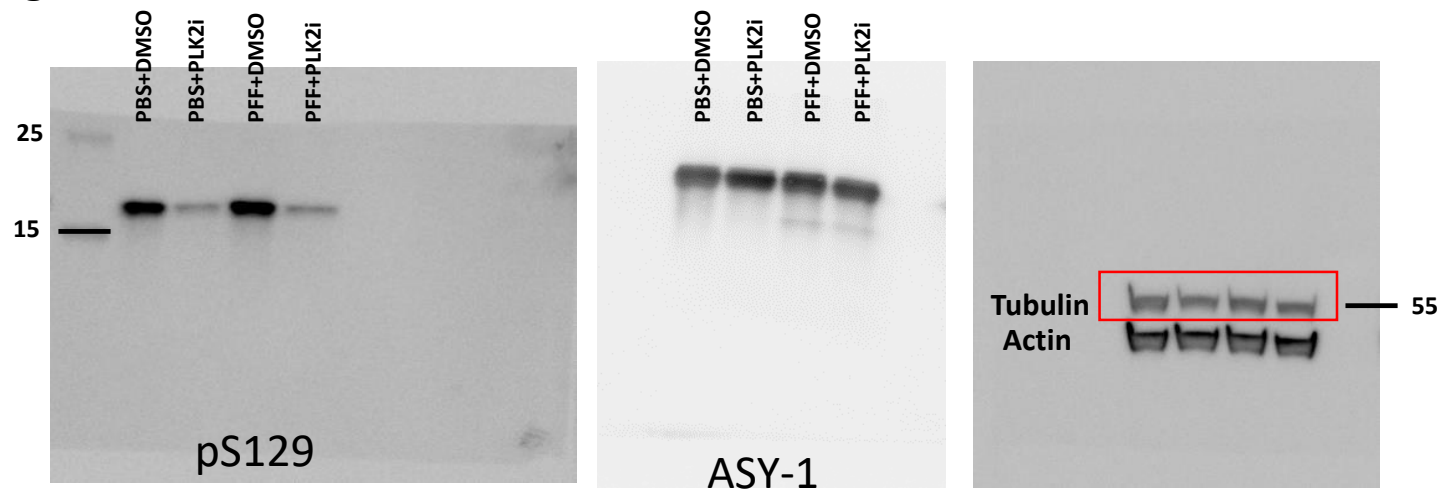

Supplement: pone.0252635.s005.pdf [file pone.0252635.s005.pdf]
